# Supplementary material for: SERS detection of glucose using graphene-oxide-wrapped gold nanobones with silver coating
Source: Royal Society of Chemistry journal article supplement (doi:10.1039/c8tc05942j), 2019-01-01
Supplement: c8tc05942j1.pdf [file c8tc05942j1.pdf]

## **SERS detection of glucose using graphene oxide-wrapped gold nanobones with silver coating**

**Jian Zhu\***, Hui-fang Du, Qi Zhang, Jing Zhao, Guo-jun Weng, Jian-jun Li, Jun-  
wu Zhao\*

The Key Laboratory of Biomedical Information Engineering of Ministry of  
Education, School of Life Science and Technology, Xi'an Jiaotong University,  
Xi'an 710049, China

**\* Corresponding author**

**Telephone:** 86-29-82664224

**Fax numbers:** 86-29-82664224

**Email:** [zhujian@mail.xjtu.edu.cn](mailto:zhujian@mail.xjtu.edu.cn); [nanoptzhao@163.com](mailto:nanoptzhao@163.com)

**Address:** School of Life Science and Technology,  
Xi'an Jiaotong University,  
Xi'an, 710049,  
Peoples Republic of China

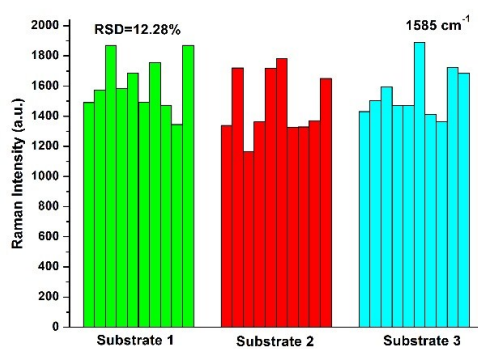

Figure S1 RSD of 4-MBA at 1585  $\text{cm}^{-1}$  in the 10 spots SERS spectra of three substrates obtained from the same condition collected on the AuNBs@Ag@GO synthesized by 150  $\mu\text{L}$   $\text{AgNO}_3$  and original GO solution: water = 1:9.
